# Supplementary material
Source: publisher figshare collection journal article supplement (https://acs.figshare.com/ndownloader/files/4393183)
Supplement: Supplementary file 1 [file 4393183]

#\#CIF_1.1
 
#  CIF produced by WinGX routine CIF_UPDATE
#  Created on 2010-06-30 at 12:50:52
#  Using CIFtbx version 2.6.2 16 Jun 1998
 
#  Dictionary name : cif_core.dic
#  Dictionary vers : 2.3
#  Request file    : c:\program files\wingx\files\archive.dat
#  CIF files read  : sch117 import struct
 
 
data_sch117
 
_audit_creation_date                    2010-06-30T12:50:52-00:00
_audit_creation_method                  'WinGX routine CIF_UPDATE'
_audit_conform_dict_name                cif_core.dic
_audit_conform_dict_version             2.3
_audit_conform_dict_location            ftp://ftp.iucr.org/pub/cif_core.dic
_publ_requested_category                FM
 
#----------------------------------------------------------------------------#
#                   CHEMICAL INFORMATION                                     #
#----------------------------------------------------------------------------#
 
_chemical_name_systematic
;
 ?
;
_chemical_name_common                   'Compound X'
_chemical_formula_moiety                'C98 H50 Mn9 N56 O10 W6'
_chemical_formula_sum                   'C108 H50 Mn9 N58 O10 W6'
_chemical_formula_weight                3917.62
_chemical_compound_source               'synthesis as described'
 
#----------------------------------------------------------------------------#
#                   UNIT CELL INFORMATION                                    #
#----------------------------------------------------------------------------#
 
_symmetry_cell_setting                  monoclinic
_symmetry_space_group_name_H-M          C2/c
_symmetry_space_group_name_Hall         '-C 2yc'
_symmetry_Int_Tables_number             15
loop_
    _symmetry_equiv_pos_as_xyz
'x, y, z'
'-x, y, -z+1/2'
'x+1/2, y+1/2, z'
'-x+1/2, y+1/2, -z+1/2'
'-x, -y, -z'
'x, -y, z-1/2'
'-x+1/2, -y+1/2, -z'
'x+1/2, -y+1/2, z-1/2'
 
_cell_length_a                          41.686(5)
_cell_length_b                          19.050(5)
_cell_length_c                          29.292(5)
_cell_angle_alpha                       90.000(5)
_cell_angle_beta                        120.028(5)
_cell_angle_gamma                       90.000(5)
_cell_volume                            20139(7)
_cell_formula_units_Z                   4
_cell_measurement_temperature           100(2)
_cell_measurement_reflns_used           14079
_cell_measurement_theta_min             0.998
_cell_measurement_theta_max             25.35
_cell_measurement_wavelength            0.71073
 
#----------------------------------------------------------------------------#
#                   CRYSTAL INFORMATION                                      #
#----------------------------------------------------------------------------#
 
_exptl_crystal_description              prism
_exptl_crystal_colour                   red
_exptl_crystal_size_max                 0.32
_exptl_crystal_size_mid                 0.15
_exptl_crystal_size_min                 0.03
_exptl_crystal_density_diffrn           1.292
_exptl_crystal_density_method           'not measured'
_exptl_crystal_F_000                    7412
 
#----------------------------------------------------------------------------#
#                   ABSORPTION CORRECTION                                    #
#----------------------------------------------------------------------------#
 
_exptl_absorpt_coefficient_mu           4.002
_exptl_absorpt_correction_type          Multi-scan
_exptl_absorpt_process_details          '(DENZO-SMN; Otwinowski & Minor, 1997)'
_exptl_absorpt_correction_T_min         0.3607
_exptl_absorpt_correction_T_max         0.8894
 
#----------------------------------------------------------------------------#
#                   DATA COLLECTION                                          #
#----------------------------------------------------------------------------#
 
_diffrn_ambient_temperature             100(2)
_diffrn_radiation_wavelength            0.71069
_diffrn_radiation_type                  MoK\a
_diffrn_radiation_monochromator         graphite
_diffrn_radiation_probe                 x-ray
_diffrn_detector_area_resol_mean        9
_diffrn_orient_matrix_type
                                     'by Bruker AXS Collect from scalepack cell'
_diffrn_orient_matrix_ub_11             0.0210321
_diffrn_orient_matrix_ub_12             -0.0208652
_diffrn_orient_matrix_ub_13             -0.0026226
_diffrn_orient_matrix_ub_21             0.0177412
_diffrn_orient_matrix_ub_22             0.0164217
_diffrn_orient_matrix_ub_23             0.0365848
_diffrn_orient_matrix_ub_31             -0.0032573
_diffrn_orient_matrix_ub_32             -0.0452825
_diffrn_orient_matrix_ub_33             0.0144759
_diffrn_measurement_device              '95mm CCD camera on \k-goniostat'
_diffrn_measurement_device_type         KappaCCD
_diffrn_measurement_method              CCD
_diffrn_reflns_av_R_equivalents         0.0612
_diffrn_reflns_av_unetI/netI            0.0603
_diffrn_reflns_number                   26188
_diffrn_reflns_limit_h_min              -40
_diffrn_reflns_limit_h_max              41
_diffrn_reflns_limit_k_min              -15
_diffrn_reflns_limit_k_max              19
_diffrn_reflns_limit_l_min              -29
_diffrn_reflns_limit_l_max              29
_diffrn_reflns_theta_min                1.13
_diffrn_reflns_theta_max                21
_diffrn_reflns_theta_full               21
_diffrn_measured_fraction_theta_full
                                        0.97
_diffrn_measured_fraction_theta_max
                                        0.97
_reflns_number_total                    10488
_reflns_number_gt                       8958
_reflns_threshold_expression            >2sigma(I)
 
#----------------------------------------------------------------------------#
#                   COMPUTER PROGRAMS USED                                   #
#----------------------------------------------------------------------------#
 
_computing_data_collection              'Collect (Bruker AXS BV, 1997-2004)'
_computing_cell_refinement
                                       'HKL Scalepack (Otwinowski & Minor 1997)'
_computing_data_reduction
                             'HKL Denzo and Scalepack (Otwinowski & Minor 1997)'
_computing_structure_solution           'SHELXS-86 (Sheldrick, 1986)'
_computing_structure_refinement         'SHELXL-97 (Sheldrick, 1997)'
_computing_molecular_graphics           'Ortep-3 for Windows (Farrugia, 1997)'
_computing_publication_material
                                   'WinGX publication routines (Farrugia, 1999)'
 
#----------------------------------------------------------------------------#
#                   REFINEMENT INFORMATION                                   #
#----------------------------------------------------------------------------#
 
_refine_special_details
;
 Refinement of F^2^ against ALL reflections.  The weighted R-factor wR and
 goodness of fit S are based on F^2^, conventional R-factors R are based
 on F, with F set to zero for negative F^2^. The threshold expression of
 F^2^ > 2sigma(F^2^) is used only for calculating R-factors(gt) etc. and is
 not relevant to the choice of reflections for refinement.  R-factors based
 on F^2^ are statistically about twice as large as those based on F, and R-
 factors based on ALL data will be even larger.
;
_refine_ls_structure_factor_coef        Fsqd
_refine_ls_matrix_type                  full
_refine_ls_weighting_scheme             calc
_refine_ls_weighting_details
      'calc w=1/[\s^2^(Fo^2^)+(0.1546P)^2^+4661.1284P] where P=(Fo^2^+2Fc^2^)/3'
_atom_sites_solution_primary            direct
_atom_sites_solution_secondary          difmap
_atom_sites_solution_hydrogens          geom
_refine_ls_hydrogen_treatment           constr
_refine_ls_extinction_method            none
_refine_ls_number_reflns                10488
_refine_ls_number_parameters            439
_refine_ls_number_restraints            65
_refine_ls_R_factor_all                 0.1456
_refine_ls_R_factor_gt                  0.1283
_refine_ls_wR_factor_ref                0.3339
_refine_ls_wR_factor_gt                 0.3172
_refine_ls_goodness_of_fit_ref          1.12
_refine_ls_restrained_S_all             1.118
_refine_ls_shift/su_max                 0.001
_refine_ls_shift/su_mean                0
_refine_diff_density_max                11.508
_refine_diff_density_min                -2.216
_refine_diff_density_rms                0.598
 
#----------------------------------------------------------------------------#
#                   ATOMIC TYPES, COORDINATES AND THERMAL PARAMETERS         #
#----------------------------------------------------------------------------#
 
loop_
    _atom_type_symbol
    _atom_type_description
    _atom_type_scat_dispersion_real
    _atom_type_scat_dispersion_imag
    _atom_type_scat_source
C C 0.0033 0.0016 'International Tables Vol C Tables 4.2.6.8 and 6.1.1.4'
H H 0 0 'International Tables Vol C Tables 4.2.6.8 and 6.1.1.4'
N N 0.0061 0.0033 'International Tables Vol C Tables 4.2.6.8 and 6.1.1.4'
O O 0.0106 0.006 'International Tables Vol C Tables 4.2.6.8 and 6.1.1.4'
Mn Mn 0.3368 0.7283 'International Tables Vol C Tables 4.2.6.8 and 6.1.1.4'
W W -0.849 6.8722 'International Tables Vol C Tables 4.2.6.8 and 6.1.1.4'
 
loop_
    _atom_site_label
    _atom_site_type_symbol
    _atom_site_fract_x
    _atom_site_fract_y
    _atom_site_fract_z
    _atom_site_U_iso_or_equiv
    _atom_site_adp_type
    _atom_site_occupancy
    _atom_site_symmetry_multiplicity
    _atom_site_calc_flag
    _atom_site_refinement_flags
    _atom_site_disorder_assembly
    _atom_site_disorder_group
W1 W 0.58233(3) 0.12112(6) 0.69432(4) 0.0133(4) Uani 1 1 d . . .
W2 W 0.57912(3) 0.12796(6) 0.42079(5) 0.0167(4) Uani 1 1 d . . .
W3 W 0.59495(3) -0.22427(6) 0.56688(5) 0.0174(4) Uani 1 1 d D . .
Mn4 Mn 0.5 0 0.5 0.0098(13) Uani 1 2 d S . .
Mn5 Mn 0.56582(12) -0.1498(2) 0.36804(17) 0.0185(11) Uani 1 1 d D . .
Mn6 Mn 0.56861(12) -0.1566(2) 0.72745(17) 0.0188(11) Uani 1 1 d . . .
Mn7 Mn 0.54751(13) 0.3150(2) 0.53544(18) 0.0227(11) Uani 1 1 d . . .
Mn8 Mn 0.67099(13) 0.0269(3) 0.61979(19) 0.0288(12) Uani 1 1 d . . .
C11 C 0.5732(8) 0.1251(15) 0.7620(12) 0.021(7) Uiso 1 1 d . . .
N11 N 0.5678(6) 0.1263(11) 0.7958(9) 0.015(5) Uiso 1 1 d . . .
C12 C 0.6047(11) 0.219(2) 0.7278(15) 0.045(10) Uiso 1 1 d . . .
N12 N 0.6162(10) 0.275(2) 0.7434(15) 0.070(11) Uiso 1 1 d . . .
C13 C 0.6350(10) 0.0944(19) 0.7625(14) 0.042(9) Uiso 1 1 d . . .
N13 N 0.6630(10) 0.0827(18) 0.7993(14) 0.060(9) Uiso 1 1 d . . .
C14 C 0.5537(8) 0.0677(16) 0.6197(12) 0.022(7) Uiso 1 1 d . . .
N14 N 0.5387(7) 0.0419(13) 0.5795(10) 0.029(7) Uiso 1 1 d . . .
C15 C 0.5244(8) 0.1372(14) 0.6680(10) 0.013(7) Uiso 1 1 d . . .
N15 N 0.4942(7) 0.1423(13) 0.6577(10) 0.027(6) Uiso 1 1 d . . .
C16 C 0.5779(8) 0.0128(16) 0.7065(11) 0.021(7) Uiso 1 1 d . . .
N16 N 0.5748(7) -0.0463(13) 0.7155(9) 0.025(6) Uiso 1 1 d . . .
C17 C 0.5657(9) 0.1975(18) 0.6322(13) 0.033(8) Uiso 1 1 d . . .
N17 N 0.5574(8) 0.2407(15) 0.5976(11) 0.038(7) Uiso 1 1 d . . .
C18 C 0.6218(8) 0.0997(15) 0.6695(11) 0.019(7) Uiso 1 1 d . . .
N18 N 0.6425(7) 0.0840(14) 0.6554(10) 0.030(7) Uiso 1 1 d . . .
C21 C 0.5929(14) 0.234(3) 0.413(2) 0.077(14) Uiso 1 1 d . . .
N21 N 0.6007(12) 0.296(2) 0.4104(17) 0.094(14) Uiso 1 1 d . . .
C22 C 0.6334(11) 0.112(2) 0.4304(15) 0.048(10) Uiso 1 1 d . . .
N22 N 0.6638(12) 0.112(2) 0.4379(16) 0.079(12) Uiso 1 1 d . . .
C23 C 0.5737(9) 0.1319(17) 0.3431(13) 0.029(8) Uiso 1 1 d . . .
N23 N 0.5683(7) 0.1323(12) 0.3006(10) 0.021(6) Uiso 1 1 d . . .
C24 C 0.5474(9) 0.0711(17) 0.4473(13) 0.031(8) Uiso 1 1 d . . .
N24 N 0.5327(8) 0.0392(14) 0.4656(11) 0.035(7) Uiso 1 1 d . . .
C25 C 0.5793(8) 0.0191(16) 0.4010(11) 0.020(7) Uiso 1 1 d . . .
C26 C 0.5222(8) 0.1470(14) 0.3634(10) 0.012(6) Uiso 1 1 d . . .
N26 N 0.4920(7) 0.1546(14) 0.3303(10) 0.031(7) Uiso 1 1 d . . .
C27 C 0.5632(8) 0.1951(16) 0.4633(11) 0.022(7) Uiso 1 1 d . . .
N27 N 0.5540(7) 0.2365(14) 0.4859(10) 0.032(7) Uiso 1 1 d . . .
C28 C 0.6181(10) 0.101(2) 0.5024(15) 0.043(10) Uiso 1 1 d . . .
N28 N 0.6374(8) 0.0806(15) 0.5459(11) 0.040(7) Uiso 1 1 d . . .
C31 C 0.6002(11) -0.319(2) 0.6099(15) 0.049(10) Uiso 1 1 d . . .
N31 N 0.6011(11) -0.374(2) 0.6328(15) 0.073(11) Uiso 1 1 d . . .
C32 C 0.6074(16) -0.308(2) 0.529(2) 0.12(2) Uiso 1 1 d D . .
N32 N 0.626(2) -0.338(4) 0.516(3) 0.23(4) Uiso 1 1 d D . .
C33 C 0.653(2) -0.239(4) 0.619(3) 0.14(3) Uiso 1 1 d . . .
N33 N 0.684(2) -0.236(4) 0.666(3) 0.16(2) Uiso 1 1 d . . .
C34 C 0.5525(8) -0.1419(14) 0.5378(11) 0.014(7) Uiso 1 1 d . . .
N34 N 0.5313(7) -0.1007(13) 0.5221(9) 0.022(6) Uiso 1 1 d . . .
C35 C 0.5837(7) -0.1955(14) 0.4895(10) 0.013(6) Uiso 1 1 d . . .
C36 C 0.5855(8) -0.1970(15) 0.6319(11) 0.017(7) Uiso 1 1 d . . .
N36 N 0.5763(6) -0.1800(11) 0.6608(8) 0.011(5) Uiso 1 1 d . . .
C37 C 0.5422(9) -0.2766(16) 0.5241(12) 0.028(8) Uiso 1 1 d . . .
N37 N 0.5131(9) -0.2999(17) 0.5022(12) 0.050(8) Uiso 1 1 d . . .
C38 C 0.6218(9) -0.1229(17) 0.5873(13) 0.031(8) Uiso 1 1 d . . .
N38 N 0.6369(8) -0.0693(15) 0.5975(11) 0.037(7) Uiso 1 1 d . . .
N511 N 0.6276(8) -0.1756(15) 0.4052(11) 0.040(7) Uiso 1 1 d . . .
C512 C 0.6503(10) -0.1382(19) 0.3952(14) 0.040(9) Uiso 1 1 d . . .
H512 H 0.6406 -0.1015 0.3698 0.047 Uiso 1 1 calc R . .
C513 C 0.6870(12) -0.152(2) 0.4208(16) 0.058(11) Uiso 1 1 d . . .
H513 H 0.7029 -0.1215 0.4154 0.069 Uiso 1 1 calc R . .
C514 C 0.7021(12) -0.208(2) 0.4546(17) 0.061(12) Uiso 1 1 d . . .
C515 C 0.6778(11) -0.250(2) 0.4633(16) 0.051(10) Uiso 1 1 d . . .
H515 H 0.6862 -0.2887 0.4868 0.062 Uiso 1 1 calc R . .
C516 C 0.6411(12) -0.231(2) 0.4355(16) 0.060(12) Uiso 1 1 d . . .
H516 H 0.6239 -0.2604 0.4386 0.072 Uiso 1 1 calc R . .
C517 C 0.7406(12) -0.224(2) 0.4835(16) 0.060(12) Uiso 1 1 d . . .
H517 H 0.7558 -0.1922 0.478 0.071 Uiso 1 1 calc R . .
N521 N 0.5551(8) -0.2649(12) 0.3425(10) 0.037(7) Uiso 1 1 d D . .
C522 C 0.5481(11) -0.3139(13) 0.3692(12) 0.054(11) Uiso 1 1 d D . .
H522 H 0.5443 -0.2996 0.3972 0.064 Uiso 1 1 calc R . .
C523 C 0.5464(12) -0.3844(14) 0.3573(13) 0.061(12) Uiso 1 1 d D . .
H523 H 0.5409 -0.4176 0.3768 0.073 Uiso 1 1 calc R . .
C524 C 0.5524(9) -0.4075(13) 0.3176(11) 0.034(8) Uiso 1 1 d D . .
C525 C 0.5515(18) -0.3569(17) 0.2834(16) 0.12(2) Uiso 1 1 d D . .
H525 H 0.5491 -0.369 0.2503 0.14 Uiso 1 1 calc R . .
C526 C 0.5543(14) -0.2882(16) 0.2991(14) 0.086(16) Uiso 1 1 d D . .
H526 H 0.5558 -0.2539 0.2767 0.103 Uiso 1 1 calc R . .
C527 C 0.5514(11) -0.482(2) 0.3060(15) 0.051(11) Uiso 1 1 d . . .
H527 H 0.5486 -0.5147 0.3283 0.062 Uiso 1 1 calc R . .
N611 N 0.5627(8) -0.7275(12) 0.2406(11) 0.038(7) Uiso 1 1 d D . .
C612 C 0.5617(17) -0.6774(17) 0.2080(17) 0.12(2) Uiso 1 1 d D . .
H612 H 0.5627 -0.6915 0.1776 0.141 Uiso 1 1 calc R . .
C613 C 0.5593(15) -0.6063(17) 0.2155(17) 0.098(18) Uiso 1 1 d D . .
H613 H 0.5596 -0.573 0.1916 0.118 Uiso 1 1 calc R . .
C614 C 0.5565(10) -0.5843(15) 0.2583(14) 0.046(10) Uiso 1 1 d D . .
C615 C 0.5468(19) -0.6364(19) 0.282(2) 0.13(3) Uiso 1 1 d D . .
H615 H 0.5362 -0.6244 0.3031 0.162 Uiso 1 1 calc R . .
C616 C 0.5525(18) -0.7059(19) 0.275(2) 0.13(2) Uiso 1 1 d D . .
H616 H 0.549 -0.7403 0.2954 0.154 Uiso 1 1 calc R . .
C617 C 0.5543(10) -0.508(2) 0.2650(15) 0.049(10) Uiso 1 1 d . . .
H617 H 0.5549 -0.4763 0.2403 0.058 Uiso 1 1 calc R . .
N621 N 0.6311(6) -0.1662(14) 0.7778(10) 0.036(7) Uiso 1 1 d D . .
C622 C 0.6500(11) -0.129(5) 0.760(3) 0.08(4) Uiso 0.41(5) 1 d PD A 1
H622 H 0.6368 -0.098 0.7312 0.096 Uiso 0.41(5) 1 calc PR A 1
C623 C 0.6880(12) -0.135(6) 0.782(3) 0.10(4) Uiso 0.41(5) 1 d PD A 1
H623 H 0.6998 -0.1184 0.7637 0.115 Uiso 0.41(5) 1 calc PR A 1
C625 C 0.6892(10) -0.188(4) 0.8557(17) 0.04(3) Uiso 0.41(5) 1 d PD A 1
H625 H 0.7021 -0.2028 0.8915 0.05 Uiso 0.41(5) 1 calc PR A 1
C626 C 0.6509(10) -0.191(5) 0.827(2) 0.08(4) Uiso 0.41(5) 1 d PD A 1
H626 H 0.6382 -0.212 0.8427 0.093 Uiso 0.41(5) 1 calc PR A 1
C632 C 0.6504(10) -0.217(2) 0.771(2) 0.049(19) Uiso 0.59(5) 1 d PD A 2
H632 H 0.6374 -0.2532 0.7456 0.059 Uiso 0.59(5) 1 calc PR A 2
C633 C 0.6887(11) -0.219(4) 0.799(4) 0.14(5) Uiso 0.59(5) 1 d PD A 2
H633 H 0.7014 -0.2587 0.7962 0.167 Uiso 0.59(5) 1 calc PR A 2
C635 C 0.6888(10) -0.114(4) 0.842(3) 0.11(4) Uiso 0.59(5) 1 d PD A 2
H635 H 0.7012 -0.0781 0.8672 0.137 Uiso 0.59(5) 1 calc PR A 2
C636 C 0.6507(9) -0.119(2) 0.8149(17) 0.029(15) Uiso 0.59(5) 1 d PD A 2
H636 H 0.6374 -0.0855 0.8233 0.035 Uiso 0.59(5) 1 calc PR A 2
C624 C 0.7086(8) -0.164(3) 0.8319(18) 0.085(15) Uiso 1 1 d D . .
C627 C 0.7528(18) -0.157(3) 0.864(3) 0.11(2) Uiso 1 1 d . A .
H627 H 0.7644 -0.1482 0.9008 0.134 Uiso 1 1 calc R . .
N711 N 0.8909(7) -0.1683(15) 0.9232(11) 0.039(7) Uiso 1 1 d D . .
C712 C 0.8717(10) -0.156(3) 0.9478(14) 0.12(2) Uiso 1 1 d D . .
H712 H 0.8851 -0.1502 0.985 0.148 Uiso 1 1 calc R . .
C713 C 0.8334(10) -0.152(3) 0.9222(17) 0.104(19) Uiso 1 1 d D . .
H713 H 0.8213 -0.1417 0.9416 0.124 Uiso 1 1 calc R . .
C714 C 0.8131(10) -0.163(3) 0.8688(18) 0.102(18) Uiso 1 1 d D A .
C715 C 0.8327(11) -0.165(4) 0.8422(14) 0.16(3) Uiso 1 1 d D . .
H715 H 0.82 -0.1631 0.8047 0.187 Uiso 1 1 calc R . .
C716 C 0.8709(11) -0.171(4) 0.8703(12) 0.13(2) Uiso 1 1 d D . .
H716 H 0.8837 -0.1775 0.8513 0.151 Uiso 1 1 calc R . .
C717 C 0.772(2) -0.161(4) 0.845(3) 0.14(3) Uiso 1 1 d . . .
H717 H 0.7585 -0.1636 0.8077 0.167 Uiso 1 1 calc R A .
O71 O 0.5459(8) 0.3951(16) 0.5875(12) 0.070(9) Uiso 1 1 d . . .
O72 O 0.5372(9) 0.3923(17) 0.4766(13) 0.078(9) Uiso 1 1 d . . .
O82 O 0.7089(9) -0.0194(17) 0.6963(13) 0.081(9) Uiso 1 1 d . . .
O83 O 0.7027(10) -0.0261(19) 0.5863(14) 0.095(11) Uiso 1 1 d . . .
O84 O 0.7151(11) 0.108(2) 0.6437(16) 0.111(13) Uiso 1 1 d . . .
N35 N 0.5746(10) -0.1564(17) 0.4507(7) 0.066(10) Uiso 1 1 d D . .
N25 N 0.5766(7) -0.0372(14) 0.3885(10) 0.032(7) Uiso 1 1 d . . .
 
loop_
    _atom_site_aniso_label
    _atom_site_aniso_U_11
    _atom_site_aniso_U_22
    _atom_site_aniso_U_33
    _atom_site_aniso_U_23
    _atom_site_aniso_U_13
    _atom_site_aniso_U_12
W1 0.0107(7) 0.0146(7) 0.0124(7) -0.0040(5) 0.0041(5) -0.0062(5)
W2 0.0181(8) 0.0194(7) 0.0167(7) -0.0073(5) 0.0118(6) -0.0095(5)
W3 0.0225(8) 0.0167(7) 0.0168(7) 0.0042(5) 0.0126(6) 0.0095(5)
Mn4 0.013(3) 0.009(3) 0.009(3) -0.003(2) 0.006(3) 0.001(2)
Mn5 0.020(3) 0.025(3) 0.017(2) -0.003(2) 0.015(2) -0.003(2)
Mn6 0.027(3) 0.020(3) 0.015(2) 0.002(2) 0.015(2) -0.001(2)
Mn7 0.030(3) 0.013(2) 0.027(3) -0.002(2) 0.016(2) -0.003(2)
Mn8 0.021(3) 0.033(3) 0.031(3) -0.001(2) 0.012(2) 0.002(2)
 
 
#----------------------------------------------------------------------------#
#                   MOLECULAR GEOMETRY                                       #
#----------------------------------------------------------------------------#
 
_geom_special_details
;
 All esds (except the esd in the dihedral angle between two l.s. planes)
 are estimated using the full covariance matrix.  The cell esds are taken
 into account individually in the estimation of esds in distances, angles
 and torsion angles; correlations between esds in cell parameters are only
 used when they are defined by crystal symmetry.  An approximate (isotropic)
 treatment of cell esds is used for estimating esds involving l.s. planes.
;
loop_
    _geom_bond_atom_site_label_1
    _geom_bond_atom_site_label_2
    _geom_bond_distance
    _geom_bond_site_symmetry_2
    _geom_bond_publ_flag
W1 C12 2.09(4) . ?
W1 C16 2.12(3) . ?
W1 C18 2.15(3) . ?
W1 C14 2.15(3) . ?
W1 C17 2.16(3) . ?
W1 C15 2.16(3) . ?
W1 C13 2.16(4) . ?
W1 C11 2.20(3) . ?
W2 C27 2.11(3) . ?
W2 C24 2.13(3) . ?
W2 C26 2.14(3) . ?
W2 C21 2.14(5) . ?
W2 C25 2.15(3) . ?
W2 C22 2.16(4) . ?
W2 C23 2.17(3) . ?
W2 C28 2.18(4) . ?
W3 C35 2.14(3) . ?
W3 C33 2.15(8) . ?
W3 C31 2.15(4) . ?
W3 C37 2.15(3) . ?
W3 C32 2.158(19) . ?
W3 C38 2.16(3) . ?
W3 C36 2.19(3) . ?
W3 C34 2.19(3) . ?
Mn4 N24 2.19(3) 5_656 ?
Mn4 N24 2.19(3) . ?
Mn4 N14 2.21(3) 5_656 ?
Mn4 N14 2.21(3) . ?
Mn4 N34 2.23(2) 5_656 ?
Mn4 N34 2.23(2) . ?
Mn5 N11 2.21(2) 6 ?
Mn5 N25 2.21(3) . ?
Mn5 N15 2.23(3) 5_656 ?
Mn5 N35 2.263(15) . ?
Mn5 N521 2.29(2) . ?
Mn5 N511 2.29(3) . ?
Mn6 N16 2.17(3) . ?
Mn6 N36 2.18(2) . ?
Mn6 N23 2.20(2) 6_556 ?
Mn6 N26 2.23(3) 5_656 ?
Mn6 N621 2.27(2) . ?
Mn6 N611 2.27(2) 6_546 ?
Mn7 O72 2.14(3) . ?
Mn7 N17 2.18(3) . ?
Mn7 O71 2.18(3) . ?
Mn7 N27 2.19(3) . ?
Mn7 N37 2.21(3) 5_656 ?
Mn7 N711 2.25(2) 4_656 ?
Mn8 N28 2.16(3) . ?
Mn8 O82 2.18(3) . ?
Mn8 N38 2.21(3) . ?
Mn8 N18 2.22(3) . ?
Mn8 O84 2.23(4) . ?
Mn8 O83 2.24(4) . ?
C11 N11 1.12(3) . ?
N11 Mn5 2.21(2) 6_556 ?
C12 N12 1.18(5) . ?
C13 N13 1.15(4) . ?
C14 N14 1.13(4) . ?
C15 N15 1.14(3) . ?
N15 Mn5 2.23(3) 5_656 ?
C16 N16 1.18(4) . ?
C17 N17 1.21(4) . ?
C18 N18 1.17(4) . ?
C21 N21 1.24(6) . ?
C22 N22 1.17(5) . ?
C23 N23 1.15(4) . ?
N23 Mn6 2.20(2) 6 ?
C24 N24 1.17(4) . ?
C25 N25 1.12(4) . ?
C26 N26 1.15(3) . ?
N26 Mn6 2.23(3) 5_656 ?
C27 N27 1.21(4) . ?
C28 N28 1.18(4) . ?
C31 N31 1.23(5) . ?
C32 N32 1.163(19) . ?
C33 N33 1.34(9) . ?
C34 N34 1.10(3) . ?
C35 N35 1.25(3) . ?
C36 N36 1.14(3) . ?
C37 N37 1.14(4) . ?
N37 Mn7 2.21(3) 5_656 ?
C38 N38 1.16(4) . ?
N511 C516 1.31(5) . ?
N511 C512 1.33(4) . ?
C512 C513 1.35(5) . ?
C512 H512 0.95 . ?
C513 C514 1.38(6) . ?
C513 H513 0.95 . ?
C514 C515 1.41(6) . ?
C514 C517 1.43(6) . ?
C515 C516 1.37(5) . ?
C515 H515 0.95 . ?
C516 H516 0.95 . ?
C517 C517 1.32(8) 7_646 ?
C517 H517 0.95 . ?
N521 C526 1.331(18) . ?
N521 C522 1.341(18) . ?
C522 C523 1.382(18) . ?
C522 H522 0.95 . ?
C523 C524 1.381(18) . ?
C523 H523 0.95 . ?
C524 C525 1.377(18) . ?
C524 C527 1.46(5) . ?
C525 C526 1.372(18) . ?
C525 H525 0.95 . ?
C526 H526 0.95 . ?
C527 C617 1.36(5) . ?
C527 H527 0.95 . ?
N611 C612 1.336(18) . ?
N611 C616 1.336(18) . ?
N611 Mn6 2.27(2) 6_545 ?
C612 C613 1.384(18) . ?
C612 H612 0.95 . ?
C613 C614 1.381(18) . ?
C613 H613 0.95 . ?
C614 C615 1.383(19) . ?
C614 C617 1.48(5) . ?
C615 C616 1.379(18) . ?
C615 H615 0.95 . ?
C616 H616 0.95 . ?
C617 H617 0.95 . ?
N621 C636 1.335(18) . ?
N621 C626 1.337(19) . ?
N621 C622 1.343(19) . ?
N621 C632 1.345(18) . ?
C622 C623 1.383(19) . ?
C622 H622 0.95 . ?
C623 C624 1.385(19) . ?
C623 H623 0.95 . ?
C625 C626 1.383(19) . ?
C625 C624 1.383(19) . ?
C625 H625 0.95 . ?
C626 H626 0.95 . ?
C632 C633 1.382(19) . ?
C632 H632 0.95 . ?
C633 C624 1.383(19) . ?
C633 H633 0.95 . ?
C635 C636 1.378(19) . ?
C635 C624 1.384(19) . ?
C635 H635 0.95 . ?
C636 H636 0.95 . ?
C624 C627 1.60(7) . ?
C627 C717 1.17(8) . ?
C627 H627 0.95 . ?
N711 C712 1.338(18) . ?
N711 C716 1.343(18) . ?
N711 Mn7 2.25(2) 4_646 ?
C712 C713 1.383(18) . ?
C712 H712 0.95 . ?
C713 C714 1.372(19) . ?
C713 H713 0.95 . ?
C714 C715 1.384(19) . ?
C714 C717 1.50(8) . ?
C715 C716 1.385(19) . ?
C715 H715 0.95 . ?
C716 H716 0.95 . ?
C717 H717 0.95 . ?
 
loop_
    _geom_angle_atom_site_label_1
    _geom_angle_atom_site_label_2
    _geom_angle_atom_site_label_3
    _geom_angle
    _geom_angle_site_symmetry_1
    _geom_angle_site_symmetry_3
    _geom_angle_publ_flag
C12 W1 C16 147.5(13) . . ?
C12 W1 C18 95.2(13) . . ?
C16 W1 C18 91.0(11) . . ?
C12 W1 C14 142.0(13) . . ?
C16 W1 C14 70.1(11) . . ?
C18 W1 C14 72.3(11) . . ?
C12 W1 C17 71.1(14) . . ?
C16 W1 C17 141.4(12) . . ?
C18 W1 C17 79.5(12) . . ?
C14 W1 C17 71.4(12) . . ?
C12 W1 C15 101.4(13) . . ?
C16 W1 C15 91.3(11) . . ?
C18 W1 C15 144.8(10) . . ?
C14 W1 C15 75.6(11) . . ?
C17 W1 C15 77.0(11) . . ?
C12 W1 C13 76.6(14) . . ?
C16 W1 C13 75.4(12) . . ?
C18 W1 C13 70.8(12) . . ?
C14 W1 C13 128.1(12) . . ?
C17 W1 C13 133.3(13) . . ?
C15 W1 C13 143.2(12) . . ?
C12 W1 C11 77.5(13) . . ?
C16 W1 C11 79.2(11) . . ?
C18 W1 C11 145.1(11) . . ?
C14 W1 C11 132.4(11) . . ?
C17 W1 C11 127.6(12) . . ?
C15 W1 C11 69.4(11) . . ?
C13 W1 C11 74.4(12) . . ?
C27 W2 C24 70.0(12) . . ?
C27 W2 C26 79.0(11) . . ?
C24 W2 C26 74.2(11) . . ?
C27 W2 C21 70.5(16) . . ?
C24 W2 C21 139.7(16) . . ?
C26 W2 C21 90.5(15) . . ?
C27 W2 C25 141.9(11) . . ?
C24 W2 C25 72.2(12) . . ?
C26 W2 C25 95.9(10) . . ?
C21 W2 C25 147.6(15) . . ?
C27 W2 C22 128.9(13) . . ?
C24 W2 C22 132.9(13) . . ?
C26 W2 C22 143.4(12) . . ?
C21 W2 C22 80.2(17) . . ?
C25 W2 C22 75.8(13) . . ?
C27 W2 C23 134.3(12) . . ?
C24 W2 C23 129.8(12) . . ?
C26 W2 C23 71.2(11) . . ?
C21 W2 C23 75.8(16) . . ?
C25 W2 C23 76.4(11) . . ?
C22 W2 C23 72.2(13) . . ?
C27 W2 C28 77.2(13) . . ?
C24 W2 C28 74.8(13) . . ?
C26 W2 C28 145.8(12) . . ?
C21 W2 C28 104.1(17) . . ?
C25 W2 C28 88.1(12) . . ?
C22 W2 C28 70.4(14) . . ?
C23 W2 C28 142.0(13) . . ?
C35 W3 C33 111(2) . . ?
C35 W3 C31 137.6(13) . . ?
C33 W3 C31 74(2) . . ?
C35 W3 C37 83.3(11) . . ?
C33 W3 C37 145(2) . . ?
C31 W3 C37 74.2(13) . . ?
C35 W3 C32 67.8(19) . . ?
C33 W3 C32 78(3) . . ?
C31 W3 C32 73(2) . . ?
C37 W3 C32 78.3(18) . . ?
C35 W3 C38 82.7(11) . . ?
C33 W3 C38 71(2) . . ?
C31 W3 C38 134.6(13) . . ?
C37 W3 C38 144.2(12) . . ?
C32 W3 C38 125.3(18) . . ?
C35 W3 C36 144.9(10) . . ?
C33 W3 C36 93(2) . . ?
C31 W3 C36 72.6(13) . . ?
C37 W3 C36 92.3(11) . . ?
C32 W3 C36 145.2(19) . . ?
C38 W3 C36 80.9(11) . . ?
C35 W3 C34 72.5(10) . . ?
C33 W3 C34 141(2) . . ?
C31 W3 C34 131.0(12) . . ?
C37 W3 C34 73.5(11) . . ?
C32 W3 C34 133.2(19) . . ?
C38 W3 C34 70.9(11) . . ?
C36 W3 C34 72.9(10) . . ?
N24 Mn4 N24 180.0(9) 5_656 . ?
N24 Mn4 N14 93.9(10) 5_656 5_656 ?
N24 Mn4 N14 86.1(10) . 5_656 ?
N24 Mn4 N14 86.1(10) 5_656 . ?
N24 Mn4 N14 93.9(10) . . ?
N14 Mn4 N14 180.000(5) 5_656 . ?
N24 Mn4 N34 91.1(9) 5_656 5_656 ?
N24 Mn4 N34 88.9(9) . 5_656 ?
N14 Mn4 N34 89.6(9) 5_656 5_656 ?
N14 Mn4 N34 90.4(9) . 5_656 ?
N24 Mn4 N34 88.9(9) 5_656 . ?
N24 Mn4 N34 91.1(9) . . ?
N14 Mn4 N34 90.4(9) 5_656 . ?
N14 Mn4 N34 89.6(9) . . ?
N34 Mn4 N34 180.0(14) 5_656 . ?
N11 Mn5 N25 87.8(9) 6 . ?
N11 Mn5 N15 103.7(9) 6 5_656 ?
N25 Mn5 N15 94.1(10) . 5_656 ?
N11 Mn5 N35 166.9(11) 6 . ?
N25 Mn5 N35 82.1(11) . . ?
N15 Mn5 N35 85.4(11) 5_656 . ?
N11 Mn5 N521 88.6(8) 6 . ?
N25 Mn5 N521 176.4(9) . . ?
N15 Mn5 N521 87.0(9) 5_656 . ?
N35 Mn5 N521 101.4(11) . . ?
N11 Mn5 N511 85.7(9) 6 . ?
N25 Mn5 N511 92.9(10) . . ?
N15 Mn5 N511 168.4(10) 5_656 . ?
N35 Mn5 N511 86.5(12) . . ?
N521 Mn5 N511 86.5(10) . . ?
N16 Mn6 N36 88.4(9) . . ?
N16 Mn6 N23 90.7(9) . 6_556 ?
N36 Mn6 N23 172.9(9) . 6_556 ?
N16 Mn6 N26 92.4(9) . 5_656 ?
N36 Mn6 N26 86.7(9) . 5_656 ?
N23 Mn6 N26 100.4(9) 6_556 5_656 ?
N16 Mn6 N621 89.6(9) . . ?
N36 Mn6 N621 86.0(9) . . ?
N23 Mn6 N621 87.0(9) 6_556 . ?
N26 Mn6 N621 172.4(9) 5_656 . ?
N16 Mn6 N611 179.5(12) . 6_546 ?
N36 Mn6 N611 91.7(9) . 6_546 ?
N23 Mn6 N611 89.2(9) 6_556 6_546 ?
N26 Mn6 N611 88.2(10) 5_656 6_546 ?
N621 Mn6 N611 89.9(10) . 6_546 ?
O72 Mn7 N17 176.9(12) . . ?
O72 Mn7 O71 91.0(12) . . ?
N17 Mn7 O71 86.0(11) . . ?
O72 Mn7 N27 88.7(11) . . ?
N17 Mn7 N27 94.4(10) . . ?
O71 Mn7 N27 175.2(11) . . ?
O72 Mn7 N37 88.2(12) . 5_656 ?
N17 Mn7 N37 91.3(11) . 5_656 ?
O71 Mn7 N37 90.8(11) . 5_656 ?
N27 Mn7 N37 94.0(11) . 5_656 ?
O72 Mn7 N711 92.9(11) . 4_656 ?
N17 Mn7 N711 87.4(10) . 4_656 ?
O71 Mn7 N711 87.2(11) . 4_656 ?
N27 Mn7 N711 88.1(10) . 4_656 ?
N37 Mn7 N711 177.6(11) 5_656 4_656 ?
N28 Mn8 O82 174.5(12) . . ?
N28 Mn8 N38 95.6(11) . . ?
O82 Mn8 N38 89.8(11) . . ?
N28 Mn8 N18 90.5(10) . . ?
O82 Mn8 N18 89.9(11) . . ?
N38 Mn8 N18 97.4(10) . . ?
N28 Mn8 O84 90.4(13) . . ?
O82 Mn8 O84 84.1(14) . . ?
N38 Mn8 O84 167.2(13) . . ?
N18 Mn8 O84 93.7(13) . . ?
N28 Mn8 O83 90.2(12) . . ?
O82 Mn8 O83 89.1(13) . . ?
N38 Mn8 O83 85.9(12) . . ?
N18 Mn8 O83 176.5(12) . . ?
O84 Mn8 O83 82.8(14) . . ?
N11 C11 W1 178(3) . . ?
C11 N11 Mn5 167(2) . 6_556 ?
N12 C12 W1 176(3) . . ?
N13 C13 W1 177(3) . . ?
N14 C14 W1 177(3) . . ?
C14 N14 Mn4 169(3) . . ?
N15 C15 W1 174(2) . . ?
C15 N15 Mn5 176(2) . 5_656 ?
N16 C16 W1 176(3) . . ?
C16 N16 Mn6 177(2) . . ?
N17 C17 W1 178(3) . . ?
C17 N17 Mn7 174(3) . . ?
N18 C18 W1 176(3) . . ?
C18 N18 Mn8 163(2) . . ?
N21 C21 W2 178(4) . . ?
N22 C22 W2 171(4) . . ?
N23 C23 W2 175(3) . . ?
C23 N23 Mn6 165(2) . 6 ?
N24 C24 W2 175(3) . . ?
C24 N24 Mn4 168(3) . . ?
N25 C25 W2 175(3) . . ?
N26 C26 W2 176(2) . . ?
C26 N26 Mn6 171(2) . 5_656 ?
N27 C27 W2 177(3) . . ?
C27 N27 Mn7 170(2) . . ?
N28 C28 W2 174(3) . . ?
C28 N28 Mn8 171(3) . . ?
N31 C31 W3 176(4) . . ?
N32 C32 W3 155(6) . . ?
N33 C33 W3 153(7) . . ?
N34 C34 W3 178(2) . . ?
C34 N34 Mn4 166(2) . . ?
N35 C35 W3 157(2) . . ?
N36 C36 W3 171(2) . . ?
C36 N36 Mn6 169(2) . . ?
N37 C37 W3 175(3) . . ?
C37 N37 Mn7 164(3) . 5_656 ?
N38 C38 W3 178(3) . . ?
C38 N38 Mn8 174(3) . . ?
C516 N511 C512 118(3) . . ?
C516 N511 Mn5 120(3) . . ?
C512 N511 Mn5 122(2) . . ?
N511 C512 C513 121(4) . . ?
N511 C512 H512 119.7 . . ?
C513 C512 H512 119.7 . . ?
C512 C513 C514 122(4) . . ?
C512 C513 H513 118.9 . . ?
C514 C513 H513 118.9 . . ?
C513 C514 C515 117(4) . . ?
C513 C514 C517 125(4) . . ?
C515 C514 C517 118(4) . . ?
C516 C515 C514 116(4) . . ?
C516 C515 H515 122.2 . . ?
C514 C515 H515 122.2 . . ?
N511 C516 C515 126(4) . . ?
N511 C516 H516 117 . . ?
C515 C516 H516 117 . . ?
C517 C517 C514 132(6) 7_646 . ?
C517 C517 H517 113.8 7_646 . ?
C514 C517 H517 113.8 . . ?
C526 N521 C522 115(2) . . ?
C526 N521 Mn5 122.7(18) . . ?
C522 N521 Mn5 122.6(17) . . ?
N521 C522 C523 122(2) . . ?
N521 C522 H522 119.1 . . ?
C523 C522 H522 119.1 . . ?
C524 C523 C522 121(2) . . ?
C524 C523 H523 119.5 . . ?
C522 C523 H523 119.5 . . ?
C525 C524 C523 116(2) . . ?
C525 C524 C527 122(3) . . ?
C523 C524 C527 121(3) . . ?
C526 C525 C524 117(2) . . ?
C526 C525 H525 121.4 . . ?
C524 C525 H525 121.4 . . ?
N521 C526 C525 127(2) . . ?
N521 C526 H526 116.7 . . ?
C525 C526 H526 116.7 . . ?
C617 C527 C524 123(4) . . ?
C617 C527 H527 118.3 . . ?
C524 C527 H527 118.3 . . ?
C612 N611 C616 114(2) . . ?
C612 N611 Mn6 123(2) . 6_545 ?
C616 N611 Mn6 122(2) . 6_545 ?
N611 C612 C613 124(2) . . ?
N611 C612 H612 117.8 . . ?
C613 C612 H612 117.8 . . ?
C614 C613 C612 119(2) . . ?
C614 C613 H613 120.5 . . ?
C612 C613 H613 120.5 . . ?
C613 C614 C615 115(2) . . ?
C613 C614 C617 117(3) . . ?
C615 C614 C617 126(3) . . ?
C616 C615 C614 120(2) . . ?
C616 C615 H615 120.2 . . ?
C614 C615 H615 120.2 . . ?
N611 C616 C615 124(2) . . ?
N611 C616 H616 118.1 . . ?
C615 C616 H616 118.1 . . ?
C527 C617 C614 121(4) . . ?
C527 C617 H617 119.6 . . ?
C614 C617 H617 119.6 . . ?
C636 N621 C626 64(5) . . ?
C636 N621 C622 74(5) . . ?
C626 N621 C622 116(2) . . ?
C636 N621 C632 116.4(19) . . ?
C626 N621 C632 79(5) . . ?
C622 N621 C632 79(5) . . ?
C636 N621 Mn6 120.8(19) . . ?
C626 N621 Mn6 128(2) . . ?
C622 N621 Mn6 114(2) . . ?
C632 N621 Mn6 123(2) . . ?
N621 C622 C623 122(3) . . ?
N621 C622 H622 118.9 . . ?
C623 C622 H622 118.9 . . ?
C622 C623 C624 119(3) . . ?
C622 C623 H623 120.3 . . ?
C624 C623 H623 120.3 . . ?
C626 C625 C624 120(2) . . ?
C626 C625 H625 120.2 . . ?
C624 C625 H625 120.2 . . ?
N621 C626 C625 123(2) . . ?
N621 C626 H626 118.4 . . ?
C625 C626 H626 118.4 . . ?
N621 C632 C633 122(2) . . ?
N621 C632 H632 119.1 . . ?
C633 C632 H632 119.1 . . ?
C632 C633 C624 121(2) . . ?
C632 C633 H633 119.6 . . ?
C624 C633 H633 119.6 . . ?
C636 C635 C624 118(2) . . ?
C636 C635 H635 120.9 . . ?
C624 C635 H635 120.9 . . ?
N621 C636 C635 125(2) . . ?
N621 C636 H636 117.5 . . ?
C635 C636 H636 117.5 . . ?
C633 C624 C625 78(6) . . ?
C633 C624 C635 117(2) . . ?
C625 C624 C635 64(5) . . ?
C633 C624 C623 75(7) . . ?
C625 C624 C623 117(2) . . ?
C635 C624 C623 80(6) . . ?
C633 C624 C627 126(4) . . ?
C625 C624 C627 122(4) . . ?
C635 C624 C627 117(4) . . ?
C623 C624 C627 121(4) . . ?
C717 C627 C624 125(7) . . ?
C717 C627 H627 117.7 . . ?
C624 C627 H627 117.7 . . ?
C712 N711 C716 116(2) . . ?
C712 N711 Mn7 124(2) . 4_646 ?
C716 N711 Mn7 120(2) . 4_646 ?
N711 C712 C713 124(2) . . ?
N711 C712 H712 118.1 . . ?
C713 C712 H712 118.1 . . ?
C714 C713 C712 120(2) . . ?
C714 C713 H713 120.1 . . ?
C712 C713 H713 120.1 . . ?
C713 C714 C715 117(2) . . ?
C713 C714 C717 116(5) . . ?
C715 C714 C717 127(5) . . ?
C714 C715 C716 120(2) . . ?
C714 C715 H715 120.2 . . ?
C716 C715 H715 120.2 . . ?
N711 C716 C715 123(2) . . ?
N711 C716 H716 118.4 . . ?
C715 C716 H716 118.4 . . ?
C627 C717 C714 132(8) . . ?
C627 C717 H717 113.9 . . ?
C714 C717 H717 113.9 . . ?
C35 N35 Mn5 145(3) . . ?
C25 N25 Mn5 172(3) . . ?
